# Supplementary material for: Combined bioderivatization and engineering approach to improve the efficiency of geraniol production
Source: Royal Society of Chemistry journal article supplement (doi:10.1039/d1gc03419g), 2021-12-21
Supplement: d1gc03419g1.pdf [file d1gc03419g1.pdf]

## Electronic Supplementary Information

### Combined bioderivatization and engineering approach to improve the efficiency of geraniol production

Xun Wang<sup>a,b,c</sup>, Longjie Xiao<sup>a,b,c</sup>, Xinyi Zhang<sup>a,b,c</sup>, Jia Zhang<sup>a,b,c</sup>, Yu Zhang<sup>a,b,c</sup>, Fei  
Wang<sup>a,b,c</sup> and Xun Li<sup>a,b,c,\*</sup>

<sup>a</sup> Jiangsu Provincial Key Lab for the Chemistry and Utilization of Agro-forest Biomass,  
Nanjing Forestry University, Nanjing 210037, China

<sup>b</sup> Jiangsu Key Laboratory of Biomass-based Green Fuels and Chemicals, Nanjing  
Forestry University, Nanjing 210037, China

<sup>c</sup> International Innovation Center for Forest Chemicals and Materials, Nanjing Forestry  
University, Nanjing 210037, China

\*Corresponding author

E-mail: xunli@njfu.edu.cn; Tel: (+86)-025-85427635; Fax number: (+86)-025-  
85427635

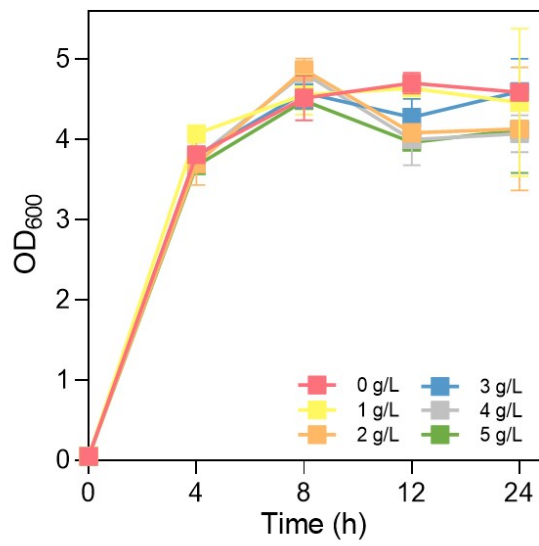

**Fig. S1** Toxicity of different concentrations of geranyl acetate (0 to 5 g/L) to *E. coli* DH5α.

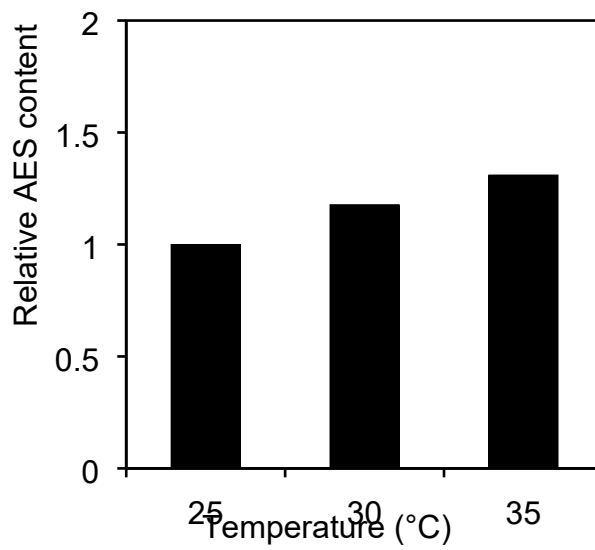

**Fig. S2** Estimation of AES expression strength at three different induction temperatures (25, 30, and 35 °C) using densitometric analysis in ImageJ.

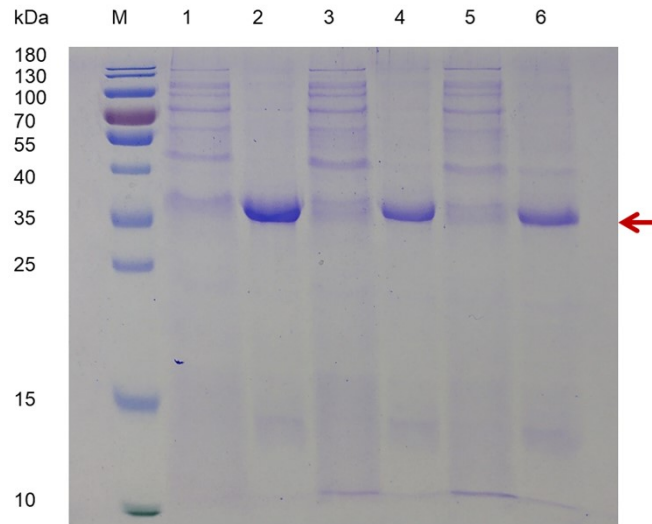

**Fig. S3** SDS-PAGE analysis of the recombinant strain E2PG expressing pelB\*AES fusion protein at different temperatures (25, 30, and 35 °C). M, protein marker; Numbers 1, 3, and 5 represent the supernatant of strain E2PG at temperatures of 25, 30, and 35 °C, respectively; Numbers 2, 4, and 6 represent the precipitation of strain E2PG at temperatures of 25, 30, and 35 °C, respectively.

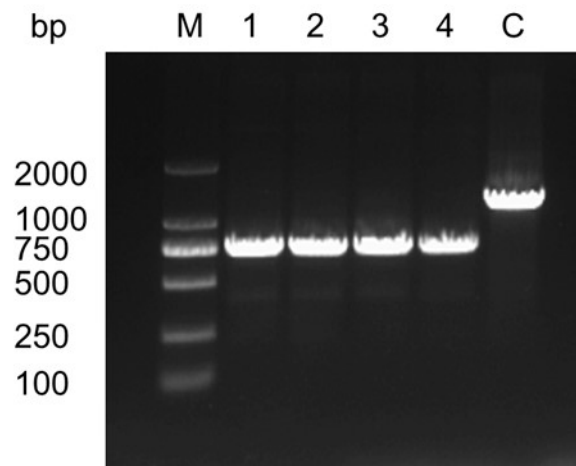

**Fig. S4** Agarose electrophoresis gel of colony PCR from 4 transformants of *lpp* knockout (1 to 4) and wild type (C).

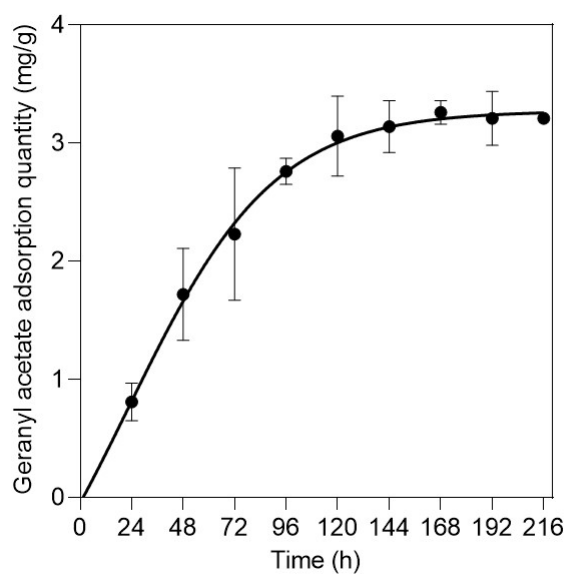

**Fig. S5** Adsorption curves of geranyl acetate using the IRA410 Cl resin.

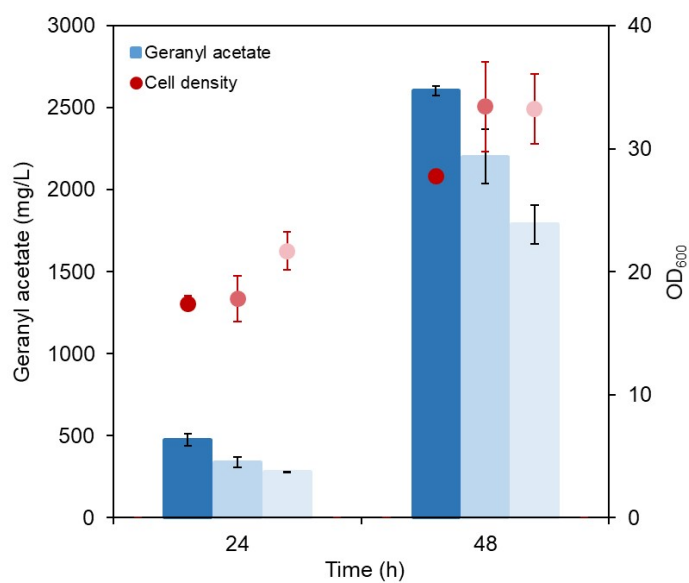

**Fig. S6** Effects of adding different proportion of isopropyl myristate on the yield of geranyl acetate and cell density. The colors from dark to light represent 10%, 20% and 40% organic overlay, respectively.

**Table S1** Primers used in this study

| Name      | Sequence 5' → 3'                             |
|-----------|----------------------------------------------|
| AAT-F     | cctaggctgcatgctcggcgtagaggat                 |
| AAT-R     | attcggatccttaatccataccaacactacttgc           |
| fadL-F    | catgccatgggcatgagccagaaaaccctgtttaca         |
| fadL-R    | ggaattctcagaacgcgtagttaagtagtaccg            |
| ompW-F    | catgccatgggcatgaaaaagttaacagtggcggt          |
| ompW-R    | ggaattcttaaaaacgatatcctgctgagaacataa         |
| AES-F     | catgccatgggcaaaccgaaaataaactgcc              |
| AES-R     | tcataactgggcggtaaaaaactgggcac                |
| pelB-F    | catatgaaatacctgctgccgaccgc                   |
| pelB-R    | ttcggtttgcccatggccatgccggctg                 |
| N20-F     | aaccagcgtcgttttagagctagaaatagcaagttaaataa    |
| N20-R     | agcacgagctactagtattatacctaggactgagctagctg    |
| X1-Δlpp-F | tcggtgcttttttgaattcgatgaacagccgtctcgagtca    |
| X1-Δlpp-R | tttcacttcacaggtactattacaggacgtgaacagatgcgg   |
| X2-Δlpp-F | aaaatcgatctagtacctgtgaagtgaaaaatggcg         |
| X2-Δlpp-R | atagatctaagcttctgcaggcagaagaacagcagaacgttcag |
